# Supplementary material
Source: PubMed Central journal article supplement (PMC3770075)

Supplementary Figure 1. Effect of hepatic GCGR knockdown on lipoprotein lipase (LPL) from si-Control and si-GCGR treated mice. Plasma LPL activity was determined using RB-LPL2 plasma assay kit (Roar Biomedical) according to manufacturer's instruction. Data are shown as mean  $\pm$  SEM, n=8.

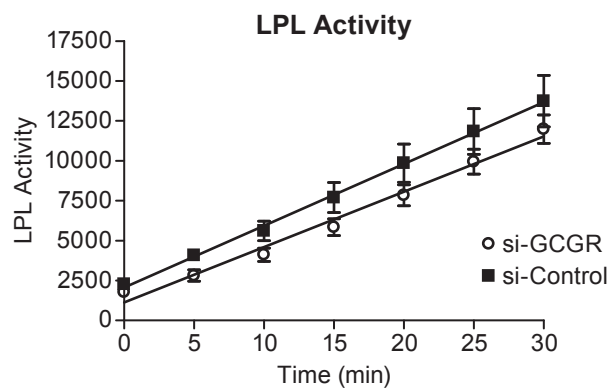

Supplement: supp_M035592_jlr.M035592-1.pdf [file supp_M035592_jlr.M035592-1.pdf]
