# Supplementary material
Source: PubMed Central journal article supplement (PMC3770075)

Supplementary Figure 2. Hepatic knockdown of fructose-1, 6 bisphosphatase 1 (FBP1) reduced fasting (A) and ambient (B) plasma glucose levels and increased LDL-C levels (C) in si-Control and si-FBP1 treated db/db mice. Data are shown as mean  $\pm$  SEM, n=8.

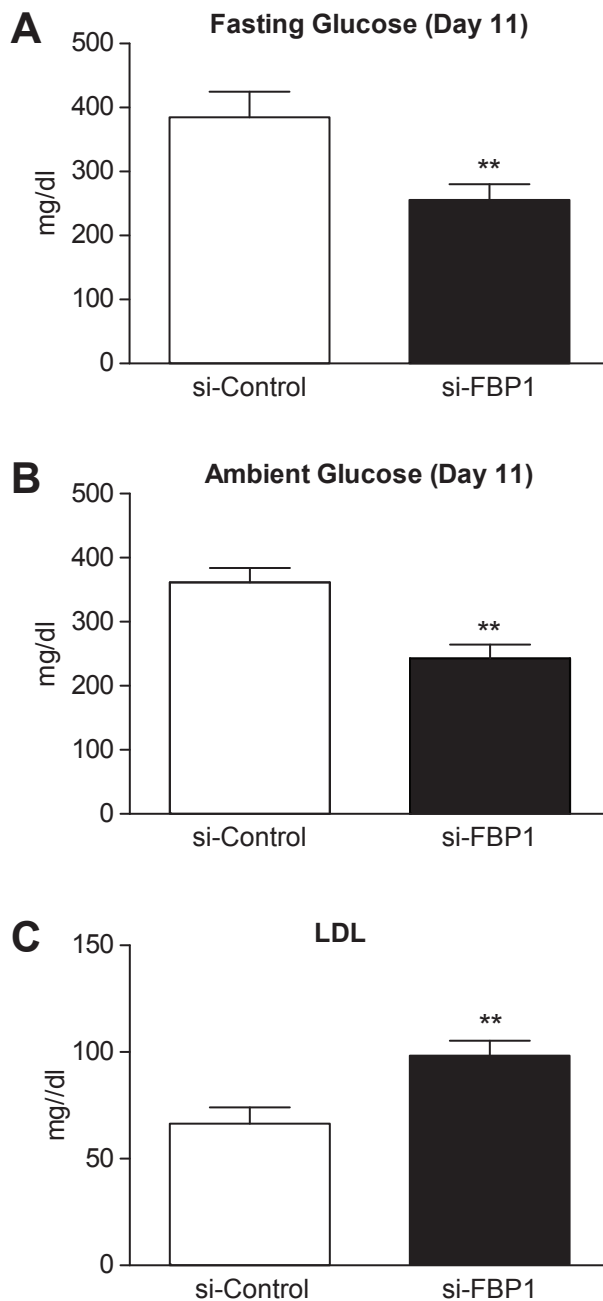

Supplement: supp_M035592_jlr.M035592-2.pdf [file supp_M035592_jlr.M035592-2.pdf]
