# Supplementary material
Source: PubMed Central journal article supplement (PMC3770075)

Supplementary Figure 3. si-GCGR in CETP-tg/Ldlr(+/-) mice lowered plasma glucose and increased LDL cholesterol levels. Nonfasting plasma glucose (A) and LDL cholesterol levels before and 4 days after treatment with phosphate buffered saline (PBS), si-Control, or si-GCGR in CETP-tg/Ldlr(+/-) mice. Data are shown as mean  $\pm$  SEM, n=8.

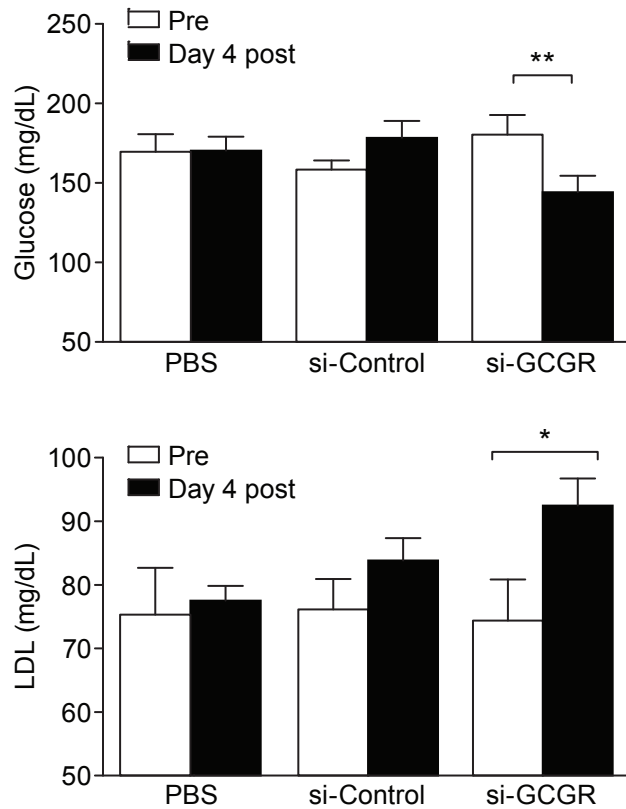

Supplement: supp_M035592_jlr.M035592-3.pdf [file supp_M035592_jlr.M035592-3.pdf]
